# Supplementary material
Source: HighWire-hosted journal article supplement (https://www.jrheum.org/highwire/filestream/42286/field_highwire_adjunct_files/0/220209DataSuppl.pdf)
Supplement: 220209DataSuppl.pdf [file 220209DataSuppl.pdf]

## Supplementary Material

### Frequency of symptomatic adverse events in rheumatoid arthritis

**Authors:** Glen S Hazlewood, Jordi Pardo Pardo, Cheryl Barnabe , Orit Schieir, Claire E.H. Barber, Laurie Proulx, Dawn P. Richards, Peter Tugwell, Nick Bansback, Pooneh Akhavan, Claire Bombardier, Vivian Bykerk, Shahin Jamal, Majed Khraishi, Regina Taylor-Gjevre, Carter Thorne, Arnav Agarwal, Janet E Pope

#### Contents:

**Pg 2. APPENDIX A: Canadian Rheumatology Association RA Guidelines Panel**

## **APPENDIX A: Canadian Rheumatology Association RA Guidelines Panel**

### **Voting Panel:**

Glen Hazlewood, Chair

Nick Bansback

Claire Barber

Jordi Pardo Pardo

Orit Schieir

Reginia Taylor-Gjevre

Peter Tugwell

### **Non-Voting Panel:**

Arnav Agarwal, Methods Expert

Pooneh Akhavan

Cheryl Barnabe

Claire Bombardier

Vivian Bykerk

Shahin Jamal

Majed Khraishi

Janet Pope

Laurie Proulx, Patient Representative

Dawn Richards, Patient Representative

Carter Thorne
